# Supplementary material
Source: MDPI journal article supplement (https://www.mdpi.com/2073-4344/11/11/1311)
Supplement: s1 [file s1]

# **Investigating (pseudo)-heterogeneous Pd-catalysts for Kraft lignin depolymerization under mild aqueous basic conditions**

**Dolorès Bourbiaux<sup>1</sup>, Yu Xu<sup>2</sup>, Laurence Burel<sup>1</sup>, Firat Goc<sup>1</sup>, Pascal Fongarland<sup>3</sup>, Régis Philippe<sup>3</sup>, Guillaume Aubert<sup>2</sup>, Cyril Aymonier<sup>2</sup>, Franck Rataboul<sup>1,\*</sup>, and Laurent Djakovitch<sup>1,\*</sup>**

<sup>1</sup> Université de Lyon, Université Claude Bernard Lyon 1, CNRS, IRCELYON, UMR 5256, 2 avenue Albert Einstein, 69626 Villeurbanne Cedex, France.

<sup>2</sup> Université de Bordeaux, CNRS, Bordeaux INP, ICMCB, UMR 5026, 87 avenue du Docteur Schweitzer, 33600 Pessac Cedex, France.

<sup>3</sup> Université de Lyon, Université Claude Bernard Lyon 1, CNRS, CPE-Lyon, CP2M, UMR 5128, 43 boulevard du 11 Novembre 1918, 69616 Villeurbanne Cedex, France.

\* Correspondence: [franck.rataboul@ircelyon.univ-lyon1.fr](mailto:franck.rataboul@ircelyon.univ-lyon1.fr) (F.R.); [laurent.djakovitch@ircelyon.univ-lyon1.fr](mailto:laurent.djakovitch@ircelyon.univ-lyon1.fr) (L.D.)

## **Supporting information**

- Scanning electron microscopy (SEM) of materials of Family 2
- X-ray diffraction (XRD) of materials of Family 2
- Plane indexing of materials of Family 2
- NMR spectroscopy and elemental analysis of Kraft lignin
- MS Spectra (from GCMS analysis) from unknown compound found in Organic fraction in certain conditions

## Scanning electron microscopy (SEM) of materials of Family 2

About twenty materials of Family 2 were synthesized by supercritical flow and initially characterized using scanning electron microscopy (SEM). A FEI XL30 ESEM-FEG apparatus (Thermo Fisher Scientific Materials & Structural Analysis, Hillsboro, Oregon, USA) was used under high vacuum mode (SE and BSE 4 dial detectors) with a 30 kV voltage and WD = 5. Materials were first dispersed in ethanol and then deposited on standard holey carbon-covered copper TEM grids. The use of TEM grids for SEM analysis was to improve the analysis conditions.

SEM characterizations conducted on **2a<sub>1</sub>**, **2b<sub>1</sub>**, **2a<sub>2</sub>**, **2a<sub>3</sub>** and **2a<sub>4</sub>** materials have demonstrated that working with Pd(acac)<sub>2</sub> and Pd(hfacac)<sub>2</sub> precursors led to aggregated particles in both cases but with better definition and homogeneity from Pd(acac)<sub>2</sub> at 300 °C. When formic acid was present, the formation mechanism of NPs was different and led to small NPs with polyhedral morphology, whereas in the absence of formic acid NPs are smaller with irregular morphology. Among the around twenty synthesized these five materials were chosen since the most representative of the modified key parameters (precursor, temperature, formic acid addition) to further characterizations by TEM and application as catalytic systems (see Main text).

**Table S1.** Synthesis parameters for some materials of Family 2.

| Catalyst              | Precursor             | Pd<br>(mmol.L <sup>-1</sup> ) | Temp.<br>(°C) | Time<br>(s) | Formic acid<br>(mmol.L <sup>-1</sup> ) | SEM<br>pictures                                                                       |
|-----------------------|-----------------------|-------------------------------|---------------|-------------|----------------------------------------|---------------------------------------------------------------------------------------|
| <b>2a<sub>1</sub></b> | Pd(acac) <sub>2</sub> | 10                            | 250           | 50          | -                                      | 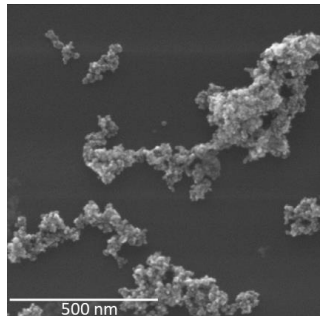 |

|            |                         |    |     |     |     |                                                                                       |
|------------|-------------------------|----|-----|-----|-----|---------------------------------------------------------------------------------------|
| <b>2b</b>  | Pd(hfacac) <sub>2</sub> | 10 | 250 | 50  | -   | 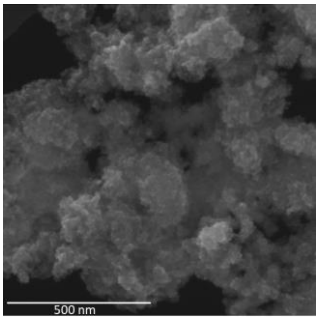   |
| <b>2a2</b> | Pd(acac) <sub>2</sub>   | 10 | 300 | 124 | -   |    |
| <b>2a3</b> | Pd(acac) <sub>2</sub>   | 10 | 300 | 83  | 100 |   |
| <b>2a4</b> | Pd(acac) <sub>2</sub>   | 5  | 300 | 10  | 20  |  |

### X-ray diffraction (XRD) of materials of Family 2

XRD analysis was conducted on Bruker D8 Advance A25 diffractometer (Bruker France SAS, Champs-sur-Marne, France) using a CuK $\alpha$  radiation ( $\lambda=0.154184$  nm). A Ni filter eliminates the K $\beta$  line from the anticathode.

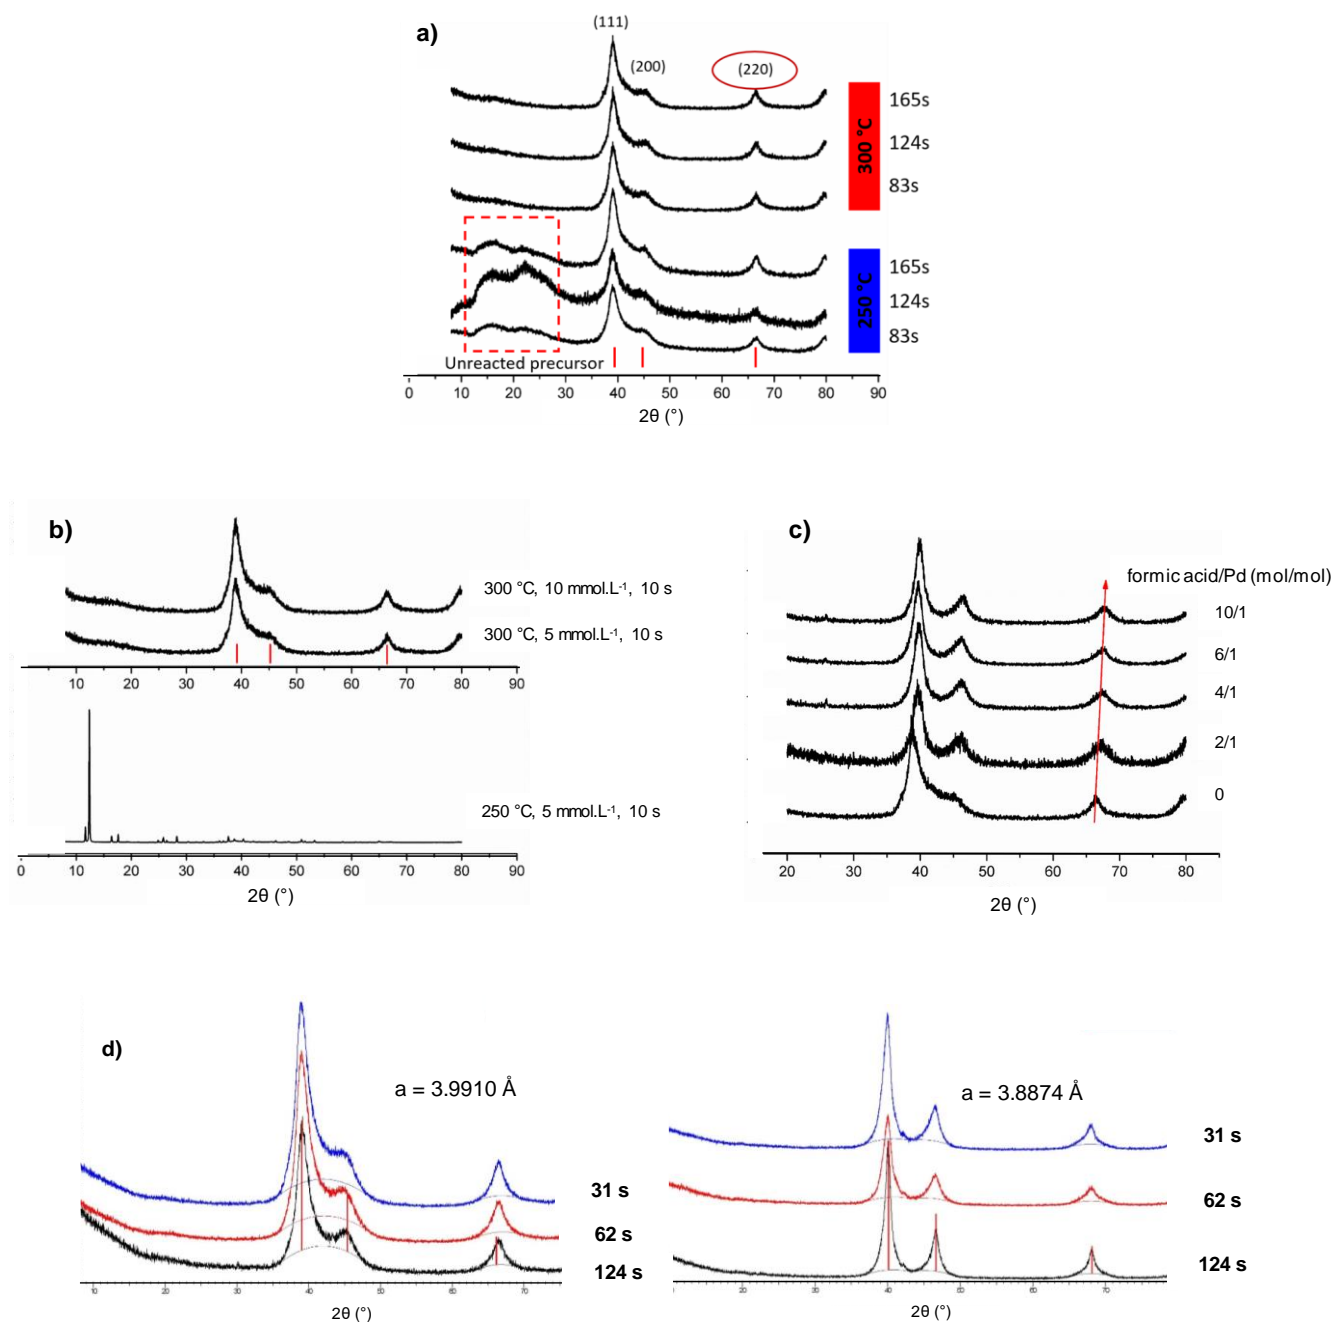

**Figure S1.** XRD diffractograms of some materials prepared under fluidic conditions from Pd(acac)<sub>2</sub>. a) influence of temperature and time (Pd(acac)<sub>2</sub> 10 mmol.L<sup>-1</sup>, 200 bar). b) influence of Pd concentration (Pd(acac)<sub>2</sub> 10 mmol.L<sup>-1</sup>, 300 °C, 200 bar 10 s). c) influence of formic acid/Pd ratio (Pd(acac)<sub>2</sub> 5 mmol.L<sup>-1</sup>, 300 °C, 200 bar, 10 s), difference in lattice constant: 3.991 Å (no formic acid) *vs* 3.879 Å (with formic acid). d) lattice parameters in the absence, and presence of formic acid (Pd(acac)<sub>2</sub> 10 mmol.L<sup>-1</sup>, 300 °C, 200 bar), lattice constant (no formic acid, left; with formic acid, right).

## Plane indexing of materials of Family 2

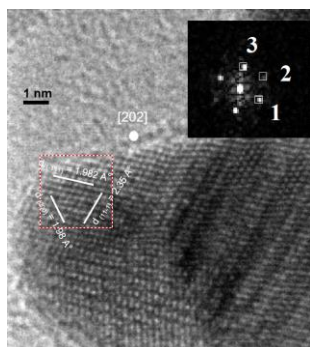

Pd-SC-300 **2a<sub>2</sub>**

Pd JCPDF 00-046-1043

| Spot | d-spacing (Å) observed | Degrees to Spot 1 | d-spacing (Å) theoretical | Angle between HKL planes theoretical | HKL  |
|------|------------------------|-------------------|---------------------------|--------------------------------------|------|
| 1    | 2.353                  | 0                 | 2.246                     | 0                                    | 11-1 |
| 2    | 1.982                  | 55.82             | 1.945                     | 54.74                                | 200  |
| 3    | 2.288                  | 110.42            | 2.246                     | 109.47                               | -111 |

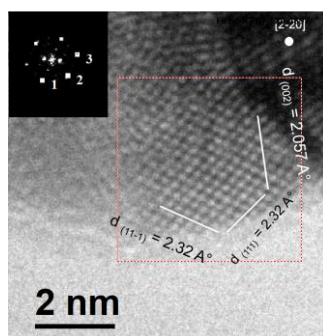

Pd-SC-250 **2b**

Pd JCPDF 89-4897

| Spot | d-spacing (Å) observed | Degrees to Spot 1 | d-spacing (Å) theoretical | Angle between HKL planes theoretical | HKL  |
|------|------------------------|-------------------|---------------------------|--------------------------------------|------|
| 1    | 2.32                   | 0                 | 2.312                     | 0                                    | 11-1 |
| 2    | 2.32                   | 69.37             | 2.312                     | 70.53                                | 111  |
| 3    | 2.057                  | 125.21            | 2.5227                    | 125.26                               | 002  |

**Figure S2.** Plane indexing of Pd nanoparticles for **2a<sub>2</sub>** and **2b** materials.

## NMR spectroscopy and elemental analysis of Kraft lignin

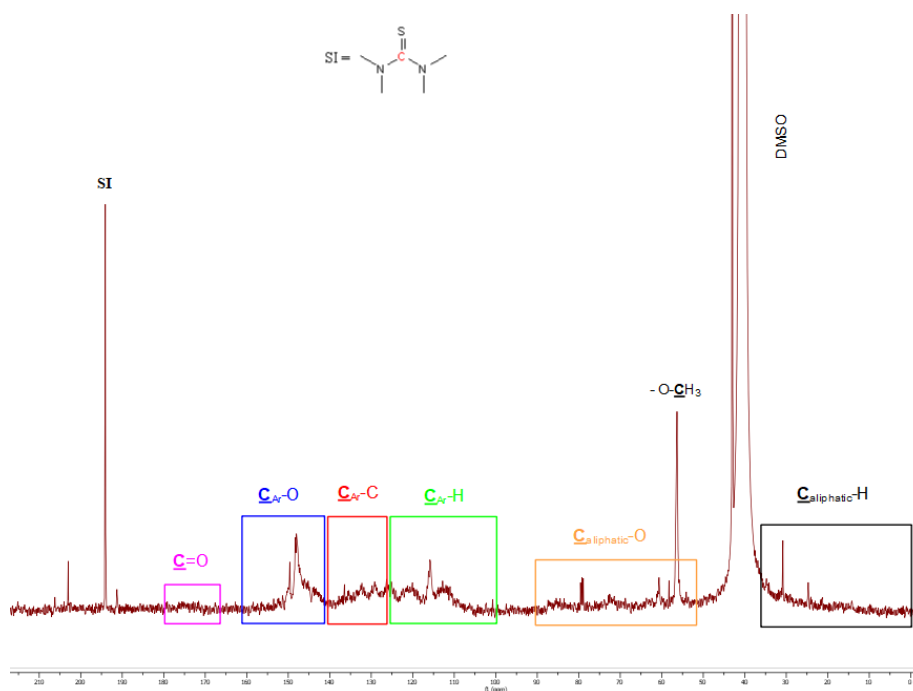

**Figure S3.** <sup>13</sup>C NMR spectrum of initial Kraft lignin (11000 scans).

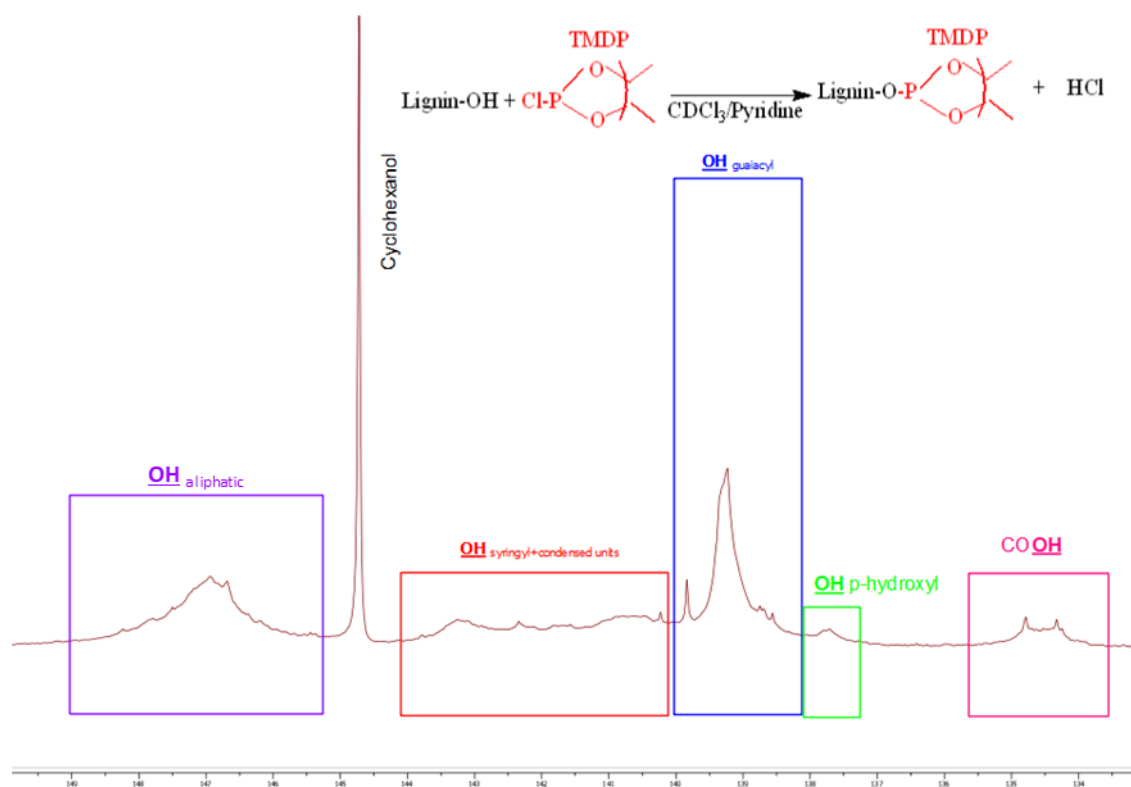

**Figure S4.**  $^{31}\text{P}$  NMR spectra of Kraft lignin after derivatization with TMDP.

**Table S2.** Quantitative data concerning C in the initial lignin, obtained by  $^{13}\text{C}$  NMR and classified by nature (see Figure S2). Comparison with elemental analysis data.

| C nature<br>( $^{13}\text{C}$ NMR chemical shift) | C content $\pm 0.05$<br>(mmol.g <sub>lignin</sub> <sup>-1</sup> ) |
|---------------------------------------------------|-------------------------------------------------------------------|
| aliphatic (10 - 34 ppm)                           | 3.0                                                               |
| CH <sub>3</sub> -O (55 - 58 ppm)                  | 2.0                                                               |
| aliphatic-O (58 - 90 ppm)                         | 3.5                                                               |
| aromatic-H (102 - 125 ppm)                        | 5.0                                                               |
| aromatic -C (125 - 142 ppm)                       | 4.5                                                               |
| aromatic -O (142 - 162 ppm)                       | 4.5                                                               |
| total aromatic (102 - 162 ppm)                    | 14                                                                |
| COOR (R=H or alkyls)                              | 0.5                                                               |
| Total                                             | 23                                                                |

| Analytical method                          | C content<br>(% <sub>wt</sub> ) |
|--------------------------------------------|---------------------------------|
| <sup>13</sup> C NMR                        | 28 ± 0.5                        |
| elemental analysis                         | 62 ± 0.5                        |
| ratio of C analyzed by <sup>13</sup> C NMR | 45%                             |

### MS Spectra (from GCMS analysis) from unknown compound found in Organic fraction in certain conditions

The mass spectra were obtained using a Shimadzu GC-MS-QP2010S (Shimadzu Europa GmbH, Duisburg, Nordrhein-Westfalen, Germany) equipped with a AOC-20i+ autosampler and a Macherey-Nagel Optima 5 MS Accent column (5 % diphenyl-95 % dimethylpolysiloxane 30 m, 0.25 mm, 0.25  $\mu\text{m}$ ) (Macherey-Nagel SAS, 1 Rue Gutenberg - BP 135, 67720 Hoerd, France). Helium was used as carrier gas. The GC program was 60  $^{\circ}\text{C}$  for 2 h, up to 150  $^{\circ}\text{C}$  (30  $^{\circ}\text{C}\cdot\text{min}^{-1}$ ), up to 200  $^{\circ}\text{C}$  (2  $^{\circ}\text{C}\cdot\text{min}^{-1}$ ), up to 260  $^{\circ}\text{C}$  (10  $^{\circ}\text{C}\cdot\text{min}^{-1}$ ) for 2 min.

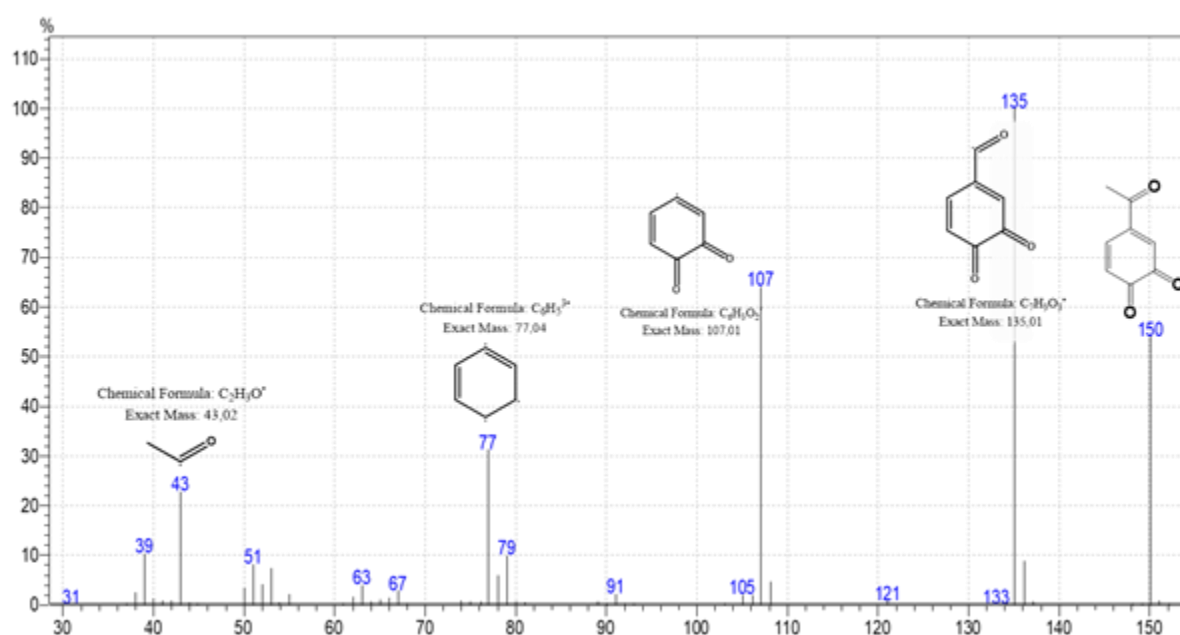

**Figure S5.** MS spectra of identified orthodiquinone reaction product formed in acetone in the presence of **2a<sub>5</sub>**.
